# Supplementary material
Source: publisher figshare collection journal article supplement (https://frontiersin.figshare.com/ndownloader/files/32583095)
Supplement: Supplementary file [file 32583095]

## Supplementary Figure 3

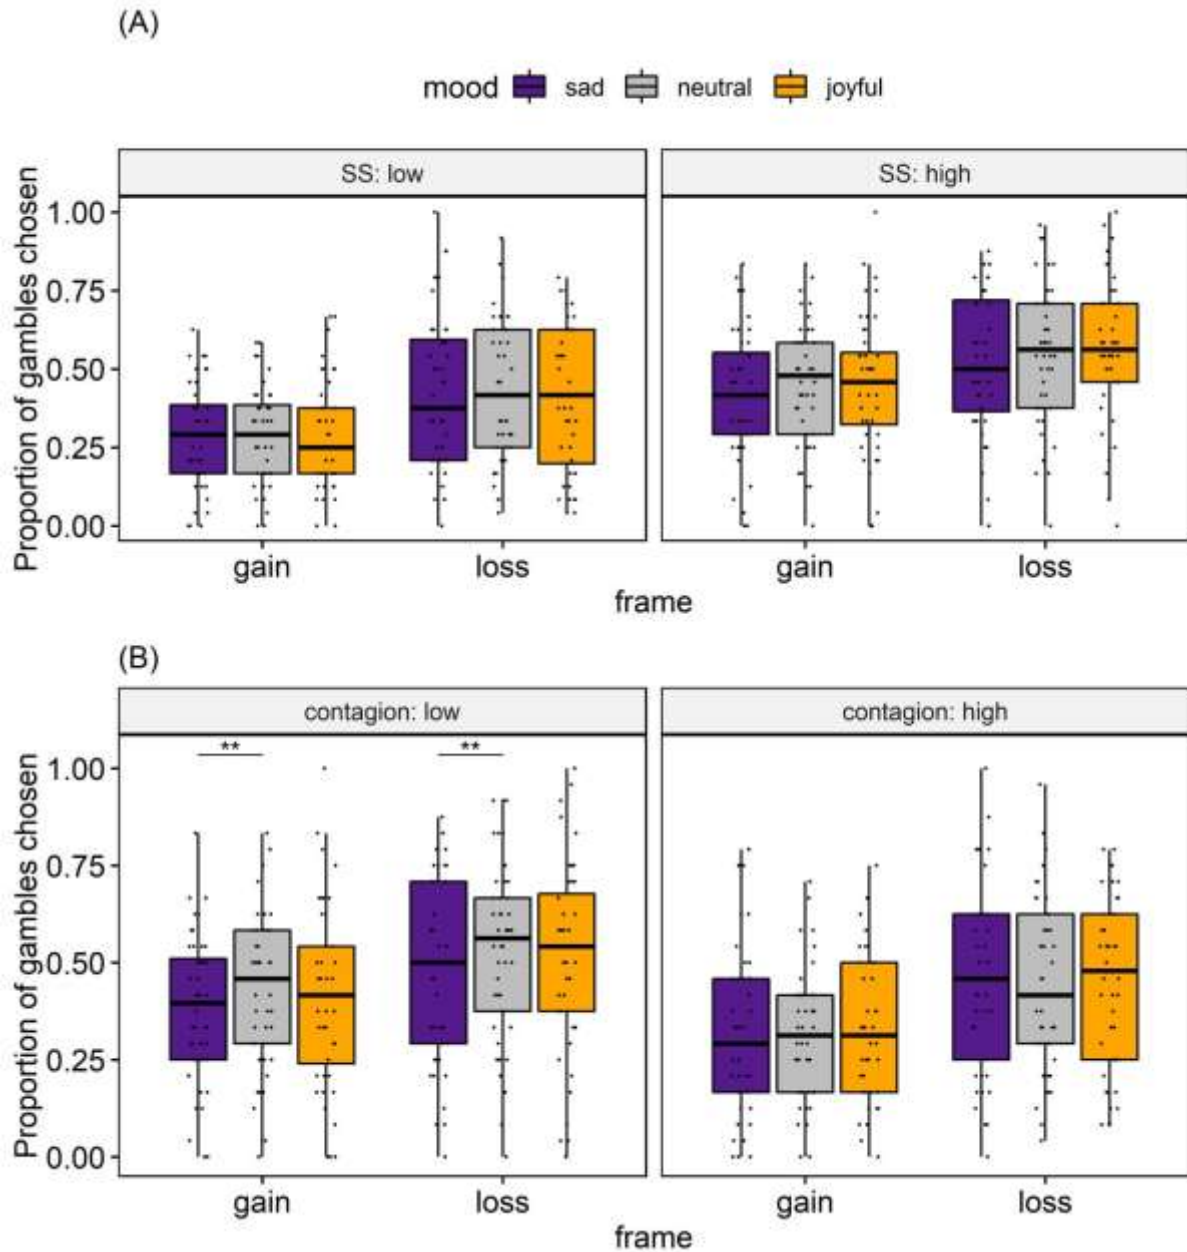

**Supplementary Figure 3.** The effect of mood induction and framing on risk-taking, separately for low and high sensation seekers (A) and for low and high contagious individuals (B). Dots represent individual subjects. Purple represents sad mood domain, grey - neutral mood domain, yellow - joyful mood domain. For each personality trait (i.e. sensation seeking and contagion), we performed a three-way mixed ANOVA to evaluate the within-subjects effect of Mood and Frame and the between-subjects effect of the corresponding personality trait on risk taking. The three-way interaction failed to reach significance in both cases (Sensation Seeking:  $F(2,172)=0.442$ ,  $p=.644$ ; Contagion:  $F(2,172)=0.344$ ,  $p=.709$ ).
